# Supplementary material
Source: publisher site journal article supplement (https://www.spandidos-publications.com/3925/downloadSupplementary)

Figure S1. RAB3IP expression following transfection. RAB3IP mRNA expression was determined using reverse transcription-quantitative PCR. The OE-NC was used as the NC for OE-RAB3IP transfection. Untransfected cells subjected to oxygen-glucose deprivation/reoxygenation were also used as an additional control (Model group). n=3. The data were analyzed using one-way ANOVA followed by Tukey's post hoc test. \*\*\*P<0.001. NS, not significant; RAB3IP, Ras-related protein RAB3A interacting protein; OE, overexpression; NC, negative control.

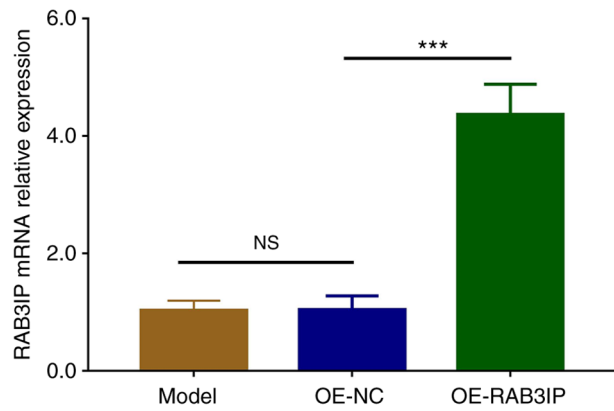

Figure S2. miR-126 regulates cell cycle progression during cerebral ischemia/reperfusion injury via RAB3IP. The number of cells in the G<sub>0</sub>/G<sub>1</sub>, S and G<sub>2</sub> phases of the cell cycle in the (A and B) Model and NC group and (C and D) among groups were determined using flow cytometry. The mimic-NC was used as the NC for mimic-miR transfection. Untransfected cells subjected to oxygen-glucose deprivation/reoxygenation were also used as an additional control (Model group). n=3. The data were analyzed using one-way ANOVA followed by Tukey's post hoc test. \*P<0.05, \*\*P<0.01. NS, not significant; RAB3IP, Ras-related protein RAB3A interacting protein; miR, microRNA; OE, overexpression; NC, negative control; PI, propidium iodide.

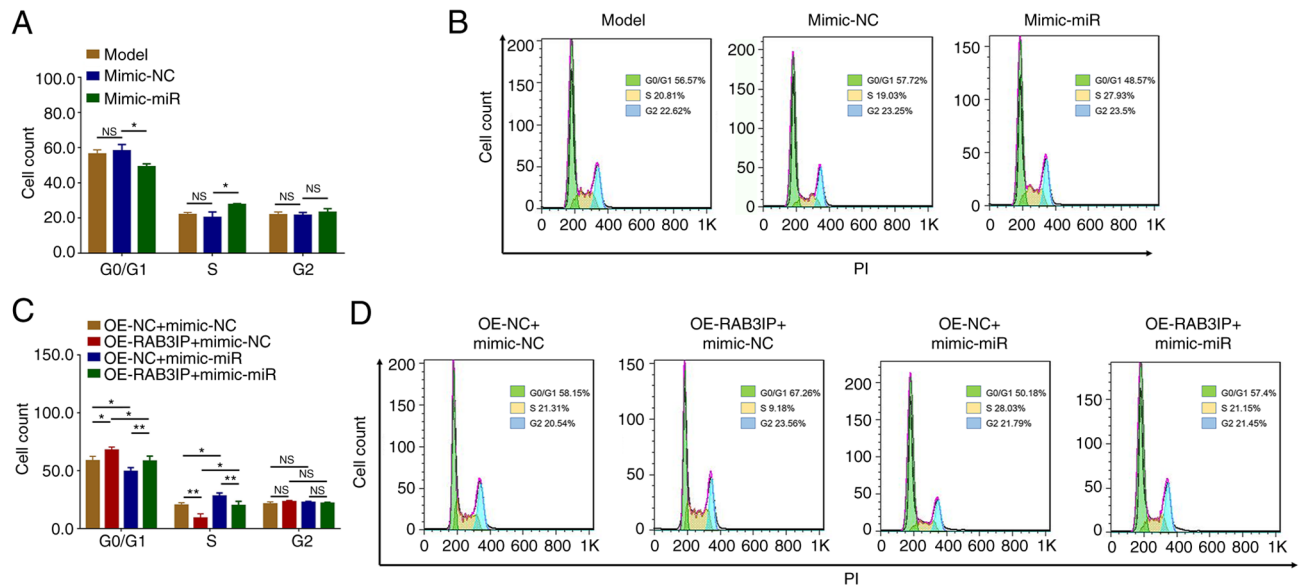

Figure S3. miR-126 regulates LDH release during cerebral ischemia/reperfusion injury via RAB3IP. LDH release in (A) the Model and NC group and (B and C) among groups was evaluated using an LDH assay. The mimic-NC was used as the NC for mimic-miR transfection. Untransfected cells subjected to oxygen-glucose deprivation/reoxygenation were also used as an additional control (Model group). n=3. The data were analyzed using one-way ANOVA followed by Tukey's post hoc test (multiple groups) or unpaired Student's t tests (two comparisons). \*P<0.05, \*\*P<0.01. RAB3IP, Ras-related protein RAB3A interacting protein; miR, microRNA; OE, overexpression; NC, negative control; LDH, lactate dehydrogenase.

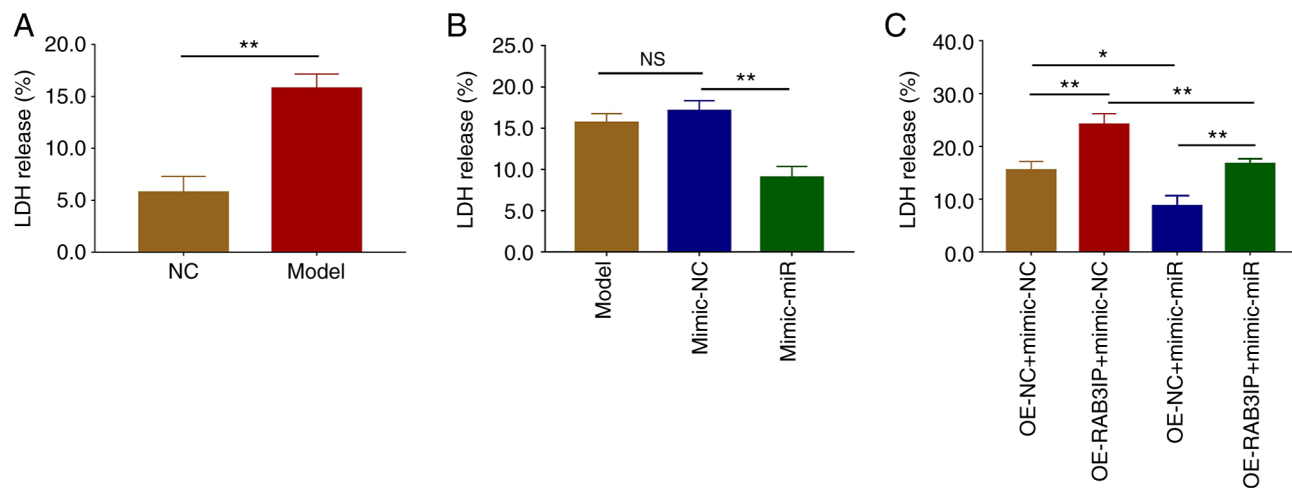

Figure S4. Schematic diagram of the study. miR-126 may directly bind to RAB3IP at the RNA level, thereby regulating the protein expression of RAB3IP. This regulates cell viability, apoptosis and cell cycle progression in the cerebral I/R injury model. miR, microRNA; RAB3IP, Ras-related protein RAB3A interacting protein.

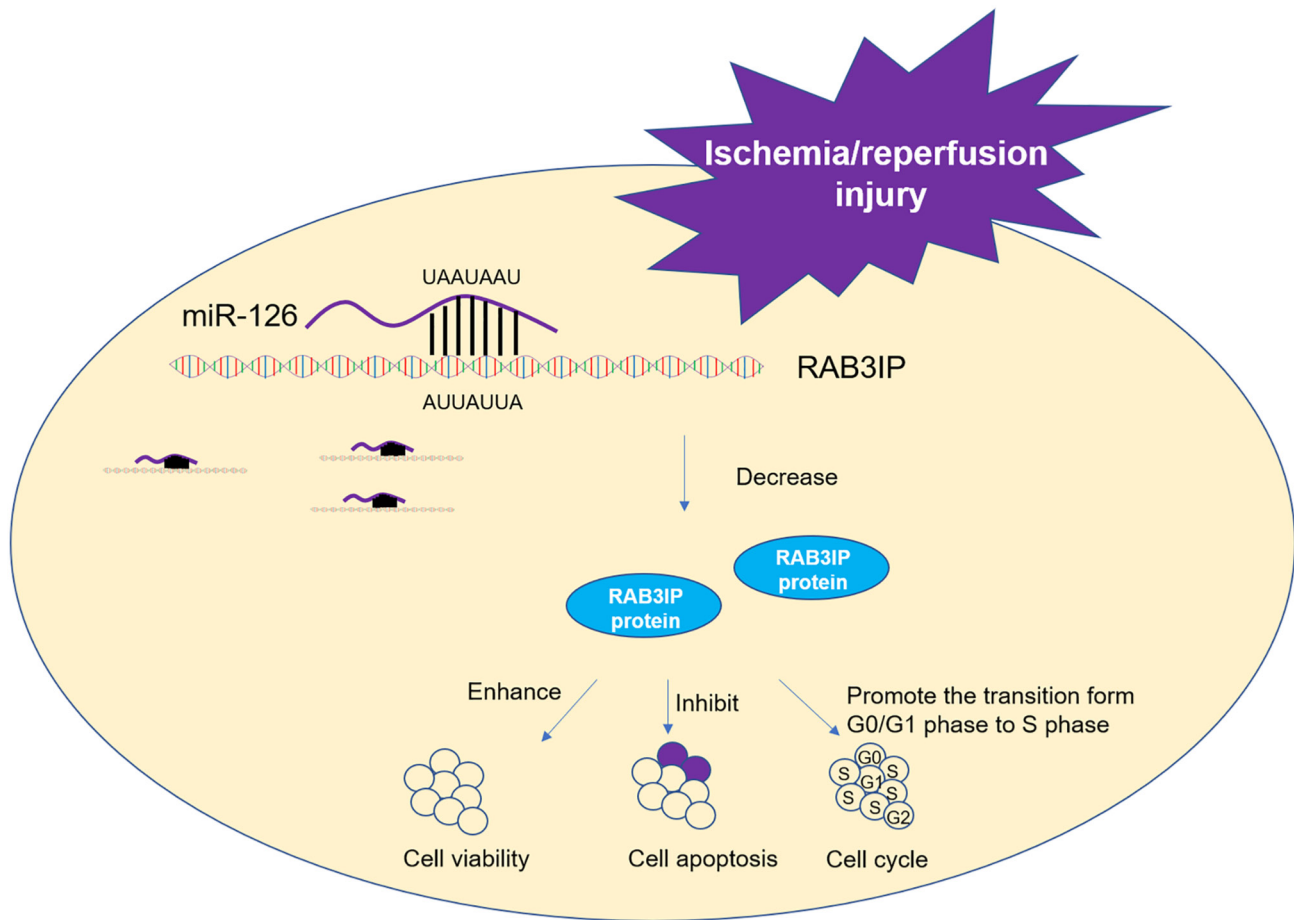

Supplement: Supplementary file 1 [file downloadSupplementary]
